# Supplementary material for: Impact of food components during in vitro digestion of silver nanoparticles on cellular uptake and cytotoxicity in intestinal cells
Source: publisher site journal article supplement (doi:10.1515/hsz-2015-0145), 2015-05-11
Supplement: Supplementary file 1 [file hsz-2015-0145_Supp_Info.docx]

**Supporting Information**

**Impact of food components during *in vitro* digestion of silver nanoparticles on cellular uptake and cytotoxicity in intestinal cells**

Dajana Lichtenstein1, Johanna Ebmeyer1, Patrick Knappe2, Sabine Juling1, Linda Böhmert1, Sören Selve3, Birgit Niemann1, Albert Braeuning1, Andreas Thünemann2, Alfonso Lampen1

1 Federal Institute for Risk Assessment, Max-Dohrn-Straße 8-10, 10589 Berlin

2 Federal Institute for Materials Research and Testing, Unter den Eichen 87, 12205 Berlin

3 ZELMI, Technical University Berlin, Straße des 17. Juni 135, 10623 Berlin

**Nanoparticle Handling Information**

**Nanoparticle synthesis and storage**

Silver nitrate and poly (acrylic acid) MW=1800 g/mol were used to synthesize silver nanoparticles in a polyol process as described by [Hu et al. (2008)](#_ENREF_12) The obtained particle suspension was characterized by small-angle X-ray scattering (SAXS) and diluted to receive a Stock suspension for subsequent cytotoxicity- and uptake experiments. Therefore, the particle dispersion were diluted to obtain a 1000 µg silver / ml MilliQ. By adding NaOH to the suspension until they showed pH of 12, stability of the stock solutions was assured due to the repulsive forces of the coating material poly (acrylic acid). The concentration of the stock suspension was determined as describe in the section “Determination of silver content in cell culture media, stock suspensions and cells”. Particle stocks were stored at 4°C in the dark.

***In vitro* digestion**

For digestion 1 ml primary particle dispersion (100 mg silver/ml) respectively silver nitrate (17 mg silver/ml), heated to 37 °C in a water bath and stirred for 5 min. In the next step, 35 ml synthetic gastric juice was added, the pH was adjusted to pH 2 and the suspension was stirred for 2 h. Finally, the pH was set to 7.5 by using sodium bicarbonate and 50 ml synthetic intestinal juice was added and the suspension was stirred for 2 more hours as also described by Böhmert et. al. (2014). The organic and inorganic components of the digestion fluids are listed in Table 1 in the manuscript. Additionally, this *in vitro* digestion model was extended by the main food components proteins, carbohydrates and fatty acids using milk powder, starch and olive oil available from consumer supermarkets. Therefore, 1 ml particle dispersion (100 mg/ml) was mixed with 1 g food components (3 equal portions of oil, starch and milk powder) followed by digestion with saliva as well as gastric and intestinal juice as described above. The samples were used without further processing for all subsequent testing. Obtained concentrations after digestion were 1 mg/ml and 0.17 mg/ml for nanoparticles respectively silver ions. All suspensions were gently mixed and aliquoted in 10 ml portions and stored at 4°C in the dark. Silver concentrations of all samples were determined as describe in the section “Determination of silver content in cell culture media, stock suspensions and cells”.

**SAXS measurements**

All samples were diluted as described below. 120 replicates of the samples were measured 10 seconds each. During digestion the stability of the particles was monitored online. For stability testing of the particle under cell culture conditions freshly digested particles were diluted with cell culture medium down to the highest concentration was used in the cytotoxicity (100 µg silver/ml). Therefore the particle suspensions were gently mixed and added in cell culture medium (DMEM) containing 10 % v/v fetal calf serum (FCS) and 100 IU/ml penicillin and 100 µg/ml streptomycin. Samples were incubated for 24 h, 37°C.

**Determination of silver content in cell culture media, stock suspensions and cells and ion release**

It was performed as described in the manuscript. Additional information; Samples received by uptake and transport experiments were additionally homogenized 3 minutes by ultrasonic treatment to avoid clusters of silver caused by storage. (Bandelin Snoorex RK 100, Germany, 350 W, 35 KHz)

**Cytotoxicity**

Stock suspension (undigested) as well as digested samples were freshly diluted in cell FCS containing cell culture medium (20, 30 ,40 ,50 and 100 µg silver/ml cell culture medium and 1,2,5 and 10 µg silver /ml AgNO3, respectively) and mixed only by gently vortexing.100 µl diluted nanoparticle sample were added to the cells and incubated for 24 h.

**Particle uptake and transport**

The sample procedure takes place as for cytotoxicity testing

In every case nanoparticle suspension in cell culture medium were freshly prepare by gently vortexing mixes and added to the cells. In uptake experiments 500 µl containing 10 or 20 µg silver /ml were used. Sample obtained by uptake and transport experiments were stored by
-80°C.

**Device parameters**

**SAXS**

SAXSess, Anton Paar,Austria

Detector: CCD-Detector, Princeton Instruments, Trenton, USA

Detector for complex matrices: 1D Diode Array Detektor Dectris Mythen 1K, Anton Paar,

Austria

Voltage: 40 kV, for complex matrices: 50 kV

Amperage: 40 mA

Measurements: 120 Replicates à 10 seconds

Software: SAXSQuant, Vers. 3.90.2743.35, Anton Paar, Austria

SASFit, Vers. 3, Paul Scherrer Institut, Schwitzerland

**Atomic Absorption Spectroscopy**

AAnalyst 800, Perkin Elmer, Shelton, USA

Wavelength: 328.1 nm

Injection volume: 20 μL

Calibration range: 4-40 ng/ml

Software: AAWinLab, Vers. 4.1, Perkin Elmer, Shelton, USA

Programm:

| Step | Temperature [°C] | Ramp time  [s] | Hold time  [s] | Internal flow [m3·min−1] | Gas type | Read step |
| --- | --- | --- | --- | --- | --- | --- |
| 1 | 110 | 1 | 10 | 250 | Argon |  |
| 2 | 130 | 45 | 30 | 250 | Argon |  |
| 3 | 800 | 10 | 20 | 250 | Argon |  |
| 4 | 1700 | 0 | 1 |  | Argon | x |
| 5 | 2450 | 1 | 3 | 250 | Argon |  |

**Ultrasonic procedure**

Bandelin Sonorex RK 100, Bandelin, Germany

Operating frequency: 35 kHz

Performance: 360 W

Sample treatment: 3 minutes + strong vortexing

**Microwave Digestion Systems**

MLS Ethos-1600; MLS Germany

Rotor: 1000/10 Rotor

Temperature control: ATC-CE 400

Software: easyCONTROL 1640/T640

Program:

| **Step** | **Energy [W]** | **Temperature [°C]** | **Time [min]** |
| --- | --- | --- | --- |
| 1 | 700 | 85 | 2 |
| 2 | 500 | 135 | 3.5 |
| 3 | 1000 | 180 | 4.5 |
| 4 | 100 | 190 | 40 |
